# Supplementary material for: Intrabody Tetrodotoxin Distribution and Possible Hypothesis for Its Migration in Ribbon Worms Cephalothrix cf. simula (Palaeonemertea, Nemertea)
Source: MDPI journal article supplement (doi:10.3390/md19090494), 2021-08-29
Supplement: s1 [file s1]

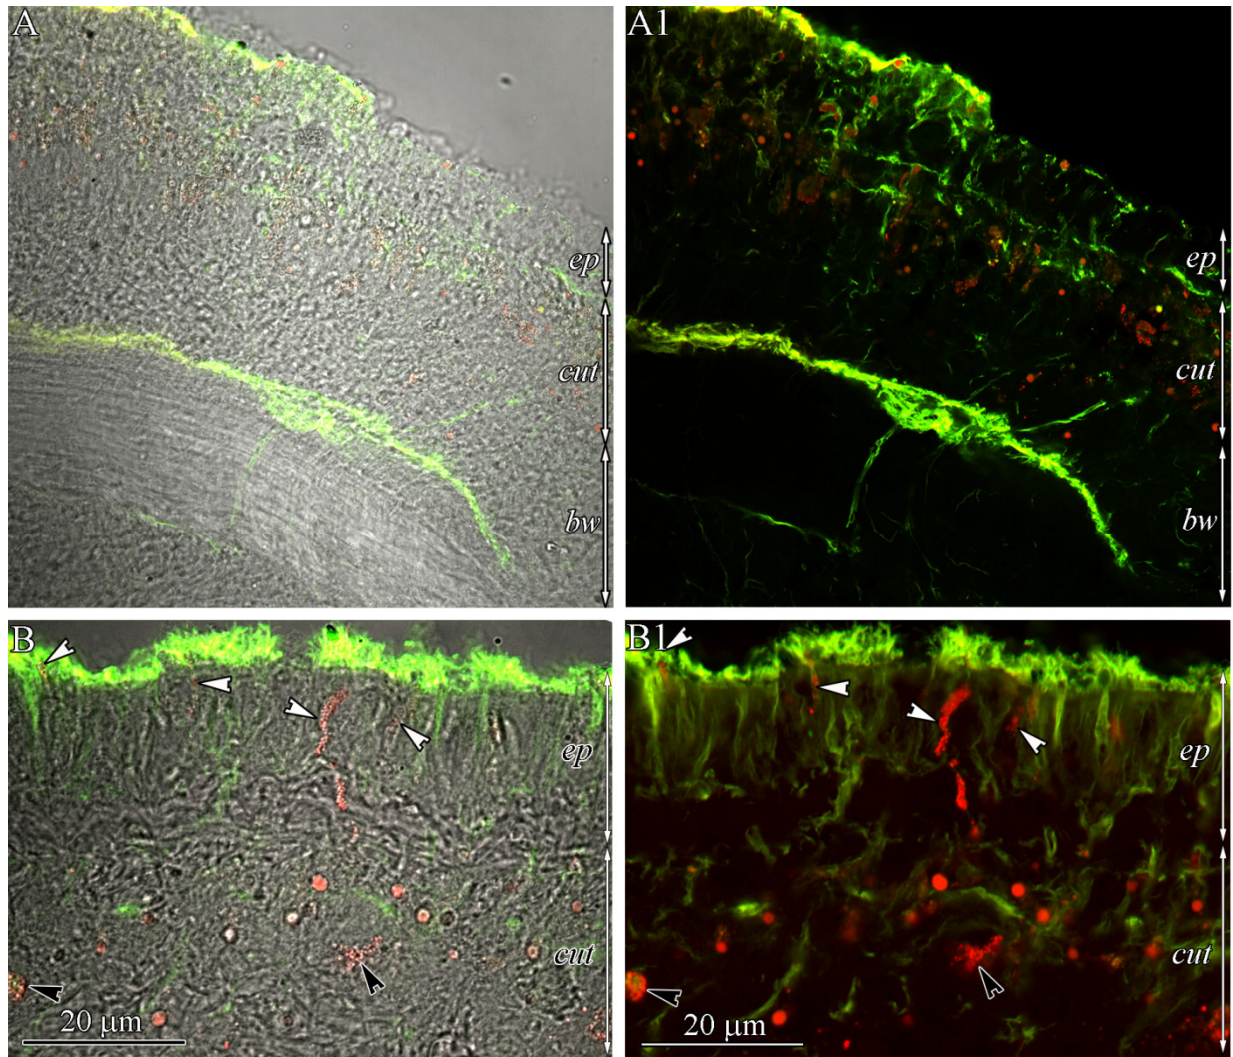

Figure S1. TTX-like immunoreactivity of the integument of heteronemertea *Kulikovia alborostrata*. Confocal laser scanning micrographs, substacks of transverse sections. Red, TTX-like immunoreactivity; green,  $\alpha$ -acetylated tubulin immunoreactivity; blue, nuclei (DAPI). (A) Panoramic view showing body wall (B) The epidermis (ep) contains apical extension (white arrowheads) of bacillary gland cells type I that are filled by TTX-positive granules; the cutis (cut) (subepidermal layer) contains bodies of bacillary gland cells type I that are filled by TTX-positive granules (black arrowheads). bw, body wall; ep, epidermis, cut, cutis
