# Supplementary material for: Intrabody Tetrodotoxin Distribution and Possible Hypothesis for Its Migration in Ribbon Worms Cephalothrix cf. simula (Palaeonemertea, Nemertea)
Source: Mar Drugs. 2021 Aug 29;19(9):494. doi: 10.3390/md19090494 (PMC8465930; doi:10.3390/md19090494)
Supplement: Supplementary file 1 [file marinedrugs-19-00494-s001.zip › Supplementary S2.xlsx]

## Sheet: Лист1
	TTX standard													Figure S2
	TTX of K.alborostrata													Figure S3
